# Supplementary material for: Aquatic Bird Bornavirus 1 in Wild Geese, Denmark
Source: PubMed Central journal article supplement (PMC4672415; doi:10.3201/eid2112.150650), 2015-12
Supplement: 15-0650-Techapp-s1.pdf [file 15-0650-Techapp-s1.pdf]

# Aquatic Bird Bornavirus 1 in Wild Geese, Denmark

## Technical Appendix

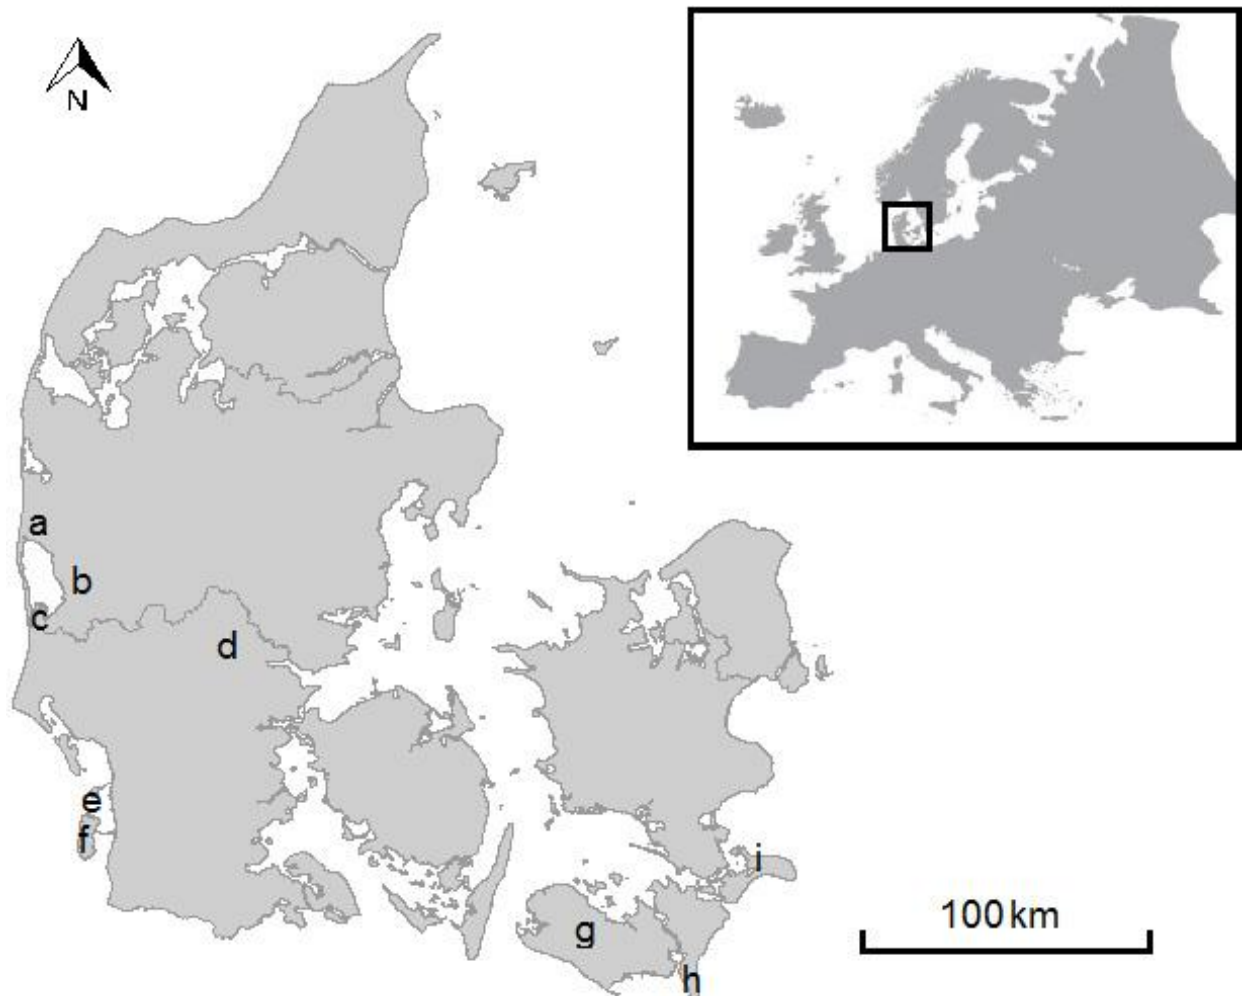

Technical Appendix Figure. Map of Denmark showing the geographic origins of wild geese tested for aquatic bird bornavirus 1 in 2014: a) west coast of Jutland; b) Skjern Enge; c) Værnengene; d) Randbøl; e) Mandø; f) Wadden Sea; g) Lolland; h) Skelby; i) Møn.
